# Supplementary material for: Assessment of biocompatibility of 3D printed photopolymers using zebrafish embryo toxicity assays
Source: Royal Society of Chemistry journal article supplement (doi:10.1039/c5lc01374g), 2015-11-24
Supplement: c5lc01374g1.pdf [file c5lc01374g1.pdf]

## Assessment of Biocompatibility of 3D printed Photopolymers using Zebrafish Embryo Toxicity Assays

N. P. Macdonald, F. Zhu, C. J. Hall, J. Reboud, P. S. Crosier, E. E. Patton, D. Wlodkowic and J. M. Cooper

### Supplementary Information

All data associated with this publication is available here: [10.5525/gla.researchdata.238](https://doi.org/10.5525/gla.researchdata.238)

**Table T1.** List of additive manufacturing materials used in this work with main specifications.

| Material                | Description/<br>Manufacturer      | Composition                                                                                                                     | Optical Quality   | Toxicity                                                                                                                                  | Certifications |
|-------------------------|-----------------------------------|---------------------------------------------------------------------------------------------------------------------------------|-------------------|-------------------------------------------------------------------------------------------------------------------------------------------|----------------|
| VisiJetCrystal EX200    | Photopolymer / 3D Systems         | Urethane acrylate oligomers 20-40%<br><br>Ethoxylated bisphenol A diacrylate 15-35%<br><br>Tripropyleneglycol diacrylate 1.5-3% | Transparent       | Urethane acrylate oligomers >2g/Kg NA<br><br>NA<br><br>Ethoxylated bisphenol A diacrylate NA<br><br>Tripropyleneglycol diacrylate > 2g/kg | USP Class VI   |
| VisiJet S300            | Wax / 3D Systems                  | Hydroxylated wax 60 – 100%                                                                                                      | Opaque, cream     | Oral LD50: 20 g/kg (rat)                                                                                                                  | None           |
| Watershed 11122XC       | Photopolymer/ DSM Corp            | N/A                                                                                                                             | Clear Transparent | N/A                                                                                                                                       | None           |
| Fototec SL.A 7150 Clear | Photopolymer/<br>Dreve Otoplastik | Alkoxilated bisphenol-A-dimethacrylates<br><br>Urethane dimethacrylate<br><br>Butanediol<br>Dimethacrylate                      | Clear Transparent | N/A                                                                                                                                       | None           |
| ABSplus P-430           | Thermo Plastic Polymer/ Stratasys | Butadiene-styrene-acrylonitrile-methyl methacrylate copolymer 70-75%<br><br>Styrene/acrylonitrile copolymer (SAN)<br><br>25-30% | Opaque, Ivory     | Oral LD50 > 5g/kg (rat)<br><br>Dermal LD50 > 2g/kg (rabbit)                                                                               | None           |

*LC50: Lethal concentration, 50 percent*

*LD50: Lethal dose, 50 percent*

*USP: United States Pharmacopeia*

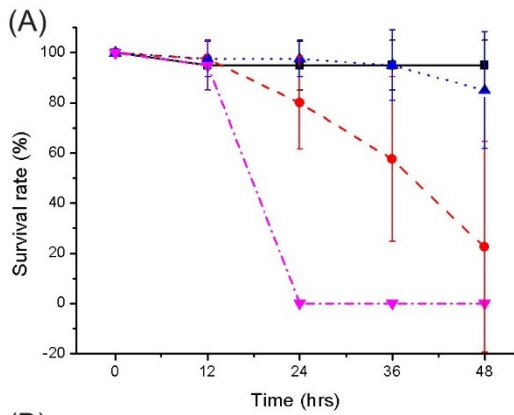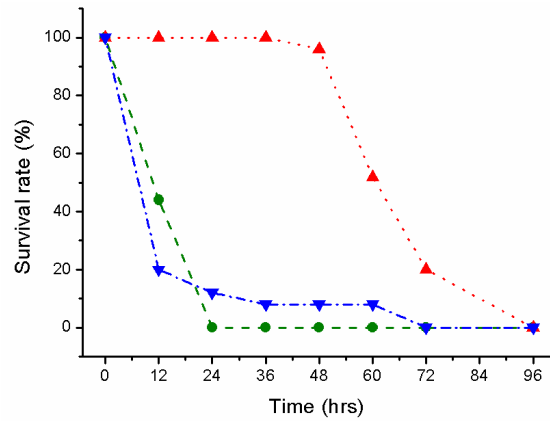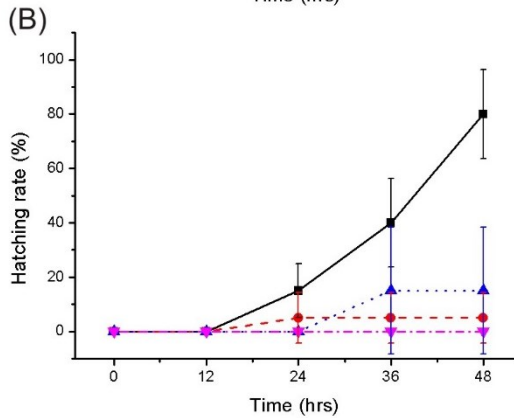

**Fig. S2** Graph showing survival rate of zebrafish embryos cultured within VisiJet Crystal wells treated with organic solvents, 5 embryos per well. The wells were treated with organic solvents, 70% EtOH (green circle), 99% EtOH (red triangle), 99% IPA (blue inverted triangle) and compared at Petri dish cultured embryos (black square). We observed that 99% EtOH promoted the highest survival rate of up to 91 hours; embryos cultured with 70% EtOH and 99% IPA treated wells survived for up to 66 hours.

**Fig. S1** Graph showing survival of 24 hpf zebrafish cultured with 3D printed materials. Zebrafish at 24 hpf were incubated (5 embryos per well,  $n=5$ ) with VisiJet Crystal (red circles) and Watershed (magenta inverted triangles). Additionally, DI washed VisiJet Crystal (blue triangle) and Petri dish cultured samples (black square) are shown. Error bars span one standard deviation from the mean. (A) Cumulative survival rate of zebrafish over a 48 hour incubation period. Watershed unwashed samples caused cell death within 25 hours of incubation. VisiJet Crystal controls shows a steady reduction of survival, washed samples however have increased survival. (B) Cumulative hatching success of zebrafish embryos over a 48 hour incubation period. Watershed unwashed hatching rate was 0%. Washing of VisiJet Crystal samples improved hatching success to  $15\% \pm 16\%$  compared to  $5\% \pm 9\%$  for unwashed samples. Hatching of control samples was  $95\% \pm 10\%$ . ( $n=4$ ). Watershed samples were equally toxic to zebrafish embryos, such that at ca. 25 hours, all zebrafish embryos were dead. In contrast, embryos on washed VisiJet Crystal samples survived longer than younger ones (85% of the embryos on the washed samples remained alive after 48h, a value comparable to the control), while the hatching rate did not improve compared to that of younger embryos.
